# Supplementary material
Source: publisher figshare collection journal article supplement (https://geolsoc.figshare.com/ndownloader/files/35521760)
Supplement: Supplementary file 1 [file 35521760]

## Sheet: Sheet1
Sample	SiO2 (%)	TiO2 (%)	Al2O3 (%)	Fe2O3 (%)	MnO (%)	MgO (%)	CaO (%)	Na2O (%)	K2O (%)	P2O5 (%)	LOI (%)	Sum (%)
SI92-18	47.33	2.27	16.26	12.1	0.19	5.67	10.84	3.11	1.24	0.42	0.44	99.43
SI92-17	52.55	1.57	17.28	10.97	0.23	2.07	5.48	5.92	2.74	0.66	0.33	99.47
SI92-16	46.86	1.53	17.12	10.01	0.15	7.69	12.78	2.61	0.74	0.26	0.11	99.75
SI92-15	46.9	1.76	18.77	10.32	0.16	5.08	12.14	3.04	0.93	0.31	0.46	99.41
SI92-14	45.94	2.12	16.16	11.29	0.17	5.39	11.56	3.02	1.07	0.4	2.73	97.12
SI92-13	47.04	2.25	16.53	12	0.18	5.54	10.82	3.4	1.3	0.44	0.34	99.5
SI92-12	45.9	1.53	13.77	10.34	0.16	12.17	12.17	2.2	0.83	0.31	0.44	99.38
std JB-1a	52.72	1.27	14.49	9.05	0.15	7.85	9.37	2.77	1.43	0.26	0.44	99.36
STD JB-1a	52.68	1.27	14.46	9.08	0.15	7.85	9.35	2.79	1.43	0.26	0.48	99.32
JB-1a, accepted value	52.41	1.28	14.45	9.02	0.148	7.83	9.31	2.73	1.4	0.26		98.838
std RGM-2	73.81	0.27	13.8	1.87	0.04	0.28	1.16	4.08	4.33	0.05	0.17	99.69
STD RGM-2	73.79	0.27	13.79	1.88	0.04	0.27	1.16	4.08	4.32	0.05	0.19	99.65
RGM-2, accepted value	73.45	0.27	13.72	1.86	0.036	0.27	1.15	4.07	4.3	0.048		99.174
std BHVO-1	49.71	2.72	13.62	12.29	0.17	7.17	11.34	2.2	0.52	0.27	0	100.01
STD BHVO-1	49.72	2.73	13.65	12.3	0.17	7.17	11.33	2.22	0.52	0.27	0	100.08
BHVO-1, accepted value	49.94	2.71	13.8	12.23	0.168	7.23	11.4	2.26	0.52	0.273		100.531
